# Supplementary material
Source: publisher figshare collection journal article supplement (https://future-science-group.figshare.com/articles/dataset/_/18319106)
Supplement: Supplementary file 1 [file 1]

## Sheet: Supplementary Table 2
Supplementary Table S2: Overview of all morphological features and their findings in all 151 patients.
ID	Remission/ Relapse	Sex	Age at diagnosis (in years)	Stage at diagnosis	OS (in months)	PFS (in months)	TiL score (in %)	TiL ordinal scores	TiL type	MedLN Sarcoid-like lesions	MedLN Homogeneity GCs	MedLN Activation GCs	MedLN Sinushistiocytosis	MedLN Size (in cm)	MedLN Sarcoid-like lesions	HilLN Homogeneity GCs	HilLN Activation GCs	HilLN Sinushistiocytosis	HilLN Size (in cm)	AffLN Extracapsular growth	AffLN Sarcoid-like lesions	AffLN Homogeneity GCs	AffLN Activation GCs	AffLN Sinushistiocytosis	AffLN Size (in cm)
1	Rem	F	53	II	53	37	10	10% or less	Desert	No	Homogeneous	Enlarged	None	1	No	Homogeneous	Small	Mild	0.45	N/A	N/A	N/A	N/A	N/A	N/A
2	Rem	M	59	I	64	62	5	10% or less	Desert	Yes	Homogeneous	Small	Strong	0.9	N/A	N/A	N/A	N/A	N/A	N/A	N/A	N/A	N/A	N/A	N/A
3	Rem	M	68	III	155	155	50	50% or higher	Inflamed	No	Inhomogeneous	Strongly enlarged	Strong	1	No	Homogeneous	Strongly enlarged	Strong	0.9	No	No	Inhomogeneous	Strongly enlarged	Strong	2.4
4	Rem	M	55	III	79	38	30	Between 10% and 50%	Inflamed	No	Inhomogeneous	Enlarged	Mild	0.9	N/A	N/A	N/A	N/A	N/A	No	No	Homogeneous	Small	Mild	2
5	Rem	M	60	I	36	28	50	50% or higher	Inflamed	No	Homogeneous	Small	Strong	1.7	Yes	Inhomogeneous	Enlarged	Strong	1.5	N/A	N/A	N/A	N/A	N/A	N/A
6	Rem	M	62	I	81	76	10	10% or less	Excluded	No	Homogeneous	Small	Mild	0.6	No	Homogeneous	Small	Mild	0.5	N/A	N/A	N/A	N/A	N/A	N/A
7	Rem	M	62	I	31	31	20	Between 10% and 50%	Inflamed	No	Homogeneous	Small	Mild	0.4	No	Homogeneous	Small	Strong	0.5	N/A	N/A	N/A	N/A	N/A	N/A
8	Rem	F	65	I	166	68	N/A	N/A	N/A	N/A	N/A	N/A	N/A	N/A	Yes	Homogeneous	Small	Mild	0.95	N/A	N/A	N/A	N/A	N/A	N/A
9	Rem	M	73	II	167	36	10	10% or less	Excluded	No	Inhomogeneous	Strongly enlarged	Mild	1.2	No	Homogeneous	Small	None	0.9	N/A	N/A	N/A	N/A	N/A	N/A
10	Rem	F	46	II	113	113	10	10% or less	Excluded	No	Homogeneous	Small	Mild	0.55	No	Homogeneous	Enlarged	Mild	0.6	N/A	N/A	N/A	N/A	N/A	N/A
11	Rem	M	59	II	78	32	30	Between 10% and 50%	Inflamed	No	Homogeneous	Small	None	N/A	No	Homogeneous	Small	Strong	0.8	N/A	N/A	N/A	N/A	N/A	N/A
12	Rem	F	55	I	160	161	20	Between 10% and 50%	Excluded	No	Homogeneous	Small	None	1	No	Homogeneous	Small	None	0.6	N/A	N/A	N/A	N/A	N/A	N/A
13	Rem	F	55	III	161	42	50	50% or higher	Inflamed	No	Homogeneous	Small	Strong	0.6	No	Homogeneous	Small	Strong	1.2	N/A	N/A	N/A	N/A	N/A	N/A
14	Rem	M	67	III	118	112	15	Between 10% and 50%	Inflamed	No	Homogeneous	Small	Mild	N/A	Yes	Inhomogeneous	Enlarged	Strong	1.8	N/A	N/A	N/A	N/A	N/A	N/A
15	Rem	F	62	I	146	36	5	10% or less	Desert	No	Homogeneous	Enlarged	Strong	1.1	No	Inhomogeneous	Enlarged	Strong	0.95	N/A	N/A	N/A	N/A	N/A	N/A
16	Rem	F	80	I	101	94	5	10% or less	Desert	No	Homogeneous	Strongly enlarged	Mild	1.1	No	Homogeneous	Strongly enlarged	Mild	0.9	N/A	N/A	N/A	N/A	N/A	N/A
17	Rem	F	59	I	72	61	10	10% or less	Desert	No	Inhomogeneous	Strongly enlarged	Mild	1.9	N/A	N/A	N/A	N/A	N/A	N/A	N/A	N/A	N/A	N/A	N/A
18	Rem	M	77	II	57	57	5	10% or less	Desert	No	Inhomogeneous	Enlarged	Mild	0.9	No	Homogeneous	Small	None	0.8	No	No	Homogeneous	Small	Mild	0.7
19	Rem	F	77	II	44	38	10	10% or less	Excluded	No	Inhomogeneous	Strongly enlarged	Mild	1.15	No	Inhomogeneous	Strongly enlarged	Strong	1.2	No	No	Homogeneous	Small	None	0.5
20	Rem	F	62	II	142	91	30	Between 10% and 50%	Inflamed	No	Homogeneous	Small	Mild	1.2	No	Homogeneous	Small	None	0	Yes	No	Homogeneous	Small	Mild	1.2
21	Rem	F	60	II	137	83	10	10% or less	Desert	No	Homogeneous	Small	None	0.6	No	Homogeneous	Small	Mild	1	N/A	N/A	N/A	N/A	N/A	N/A
22	Rem	M	69	II	138	108	10	10% or less	Excluded	No	Inhomogeneous	Enlarged	Strong	0.6	No	Homogeneous	Small	Mild	0.6	N/A	N/A	N/A	N/A	N/A	N/A
23	Rem	M	69	II	136	133	25	Between 10% and 50%	Inflamed	No	Homogeneous	Small	Strong	0.7	N/A	N/A	N/A	N/A	N/A	N/A	N/A	N/A	N/A	N/A	N/A
24	Rem	M	69	I	136	133	80	50% or higher	Inflamed	Yes	Homogeneous	Enlarged	Mild	1.7	No	Homogeneous	Small	Mild	0.6	N/A	N/A	N/A	N/A	N/A	N/A
25	Rem	F	53	I	135	50	5	10% or less	Excluded	No	Homogeneous	Enlarged	Mild	N/A	No	Inhomogeneous	Strongly enlarged	Mild	1.5	N/A	N/A	N/A	N/A	N/A	N/A
26	Rem	M	81	III	49	39	20	Between 10% and 50%	Inflamed	No	Inhomogeneous	Enlarged	Strong	1.4	No	Homogeneous	Enlarged	Strong	0.7	No	No	Homogeneous	Enlarged	Strong	0.6
27	Rem	F	85	I	99	80	5	10% or less	Desert	Yes	Homogeneous	Small	Mild	N/A	No	Homogeneous	Small	Strong	0.9	N/A	N/A	N/A	N/A	N/A	N/A
28	Rem	F	57	I	94	92	60	50% or higher	Inflamed	No	Inhomogeneous	Strongly enlarged	Strong	0.85	No	Inhomogeneous	Strongly enlarged	None	0.8	N/A	N/A	N/A	N/A	N/A	N/A
29	Rem	F	56	II	125	62	15	Between 10% and 50%	Desert	No	Inhomogeneous	Strongly enlarged	Mild	1.2	No	Homogeneous	Small	Strong	0	N/A	N/A	N/A	N/A	N/A	N/A
30	Rem	M	68	II	123	123	50	50% or higher	Inflamed	Yes	Homogeneous	Strongly enlarged	Strong	2.2	N/A	N/A	N/A	N/A	N/A	N/A	N/A	N/A	N/A	N/A	N/A
31	Rem	M	72	II	117	95	80	50% or higher	Inflamed	No	Homogeneous	Strongly enlarged	Strong	N/A	No	Homogeneous	Small	Strong	0.7	N/A	N/A	N/A	N/A	N/A	N/A
32	Rem	M	73	I	108	86	30	Between 10% and 50%	Inflamed	N/A	N/A	N/A	N/A	N/A	No	Homogeneous	Small	None	0.55	N/A	N/A	N/A	N/A	N/A	N/A
33	Rem	M	77	II	101	66	5	10% or less	Desert	No	Homogeneous	Small	None	1.4	No	Inhomogeneous	Enlarged	Mild	1.2	N/A	N/A	N/A	N/A	N/A	N/A
34	Rem	M	68	II	84	83	50	50% or higher	Inflamed	No	Homogeneous	Small	Strong	1.4	No	Inhomogeneous	Enlarged	None	0	N/A	N/A	N/A	N/A	N/A	N/A
35	Rem	M	47	II	108	103	5	10% or less	Desert	No	Homogeneous	Enlarged	Mild	N/A	No	Homogeneous	Enlarged	None	0.3	N/A	N/A	N/A	N/A	N/A	N/A
36	Rem	M	56	II	73	72	5	10% or less	Desert	Yes	Inhomogeneous	Strongly enlarged	Mild	1.3	No	Homogeneous	Strongly enlarged	Mild	0.5	No	No	Homogeneous	Enlarged	Mild	1
37	Rem	M	66	I	98	68	15	Between 10% and 50%	Inflamed	N/A	N/A	N/A	N/A	N/A	No	Homogeneous	Small	Mild	0.8	N/A	N/A	N/A	N/A	N/A	N/A
38	Rem	M	70	II	100	92	70	50% or higher	Inflamed	No	Homogeneous	Strongly enlarged	Mild	0.9	N/A	N/A	N/A	N/A	N/A	N/A	No	Homogeneous	Small	Mild	1.1
39	Rem	M	65	I	72	68	N/A	N/A	N/A	No	Homogeneous	Small	Mild	0.6	No	Inhomogeneous	Enlarged	Mild	0.6	N/A	N/A	N/A	N/A	N/A	N/A
40	Rem	F	52	III	52	32	50	50% or higher	Inflamed	No	Homogeneous	Strongly enlarged	Mild	1	No	Homogeneous	Enlarged	Mild	1	N/A	N/A	N/A	N/A	N/A	N/A
41	Rem	F	77	III	71	38	50	50% or higher	Inflamed	No	Homogeneous	Small	Strong	1.5	No	Homogeneous	Small	Mild	0.5	Yes	No	Homogeneous	Small	None	0.9
42	Rem	M	72	I	85	31	80	50% or higher	Inflamed	No	Homogeneous	Small	Strong	0.5	No	Inhomogeneous	Enlarged	Strong	1.2	N/A	N/A	N/A	N/A	N/A	N/A
43	Rem	F	69	I	83	76	30	Between 10% and 50%	Excluded	No	Homogeneous	Enlarged	Strong	0.8	No	Homogeneous	Enlarged	Mild	0.9	N/A	N/A	N/A	N/A	N/A	N/A
44	Rem	M	66	I	49	49	5	10% or less	Desert	No	Inhomogeneous	Enlarged	Mild	1	No	Homogeneous	Small	Mild	0.7	N/A	N/A	N/A	N/A	N/A	N/A
45	Rem	M	63	II	61	44	5	10% or less	Excluded	No	Homogeneous	Enlarged	Mild	1.15	No	Homogeneous	Enlarged	Mild	0.9	N/A	N/A	N/A	N/A	N/A	N/A
46	Rem	M	57	I	82	70	30	Between 10% and 50%	Inflamed	Yes	Homogeneous	Strongly enlarged	Mild	1.8	No	Homogeneous	Small	Strong	0.7	N/A	N/A	N/A	N/A	N/A	N/A
47	Rem	F	77	I	78	73	60	50% or higher	Inflamed	No	Homogeneous	Small	Strong	N/A	N/A	N/A	N/A	N/A	N/A	N/A	N/A	N/A	N/A	N/A	N/A
48	Rem	M	52	I	68	41	1	10% or less	Desert	Yes	Inhomogeneous	Enlarged	Mild	1.2	No	Homogeneous	Small	Mild	0.4	N/A	N/A	N/A	N/A	N/A	N/A
49	Rem	M	75	III	74	51	60	50% or higher	Excluded	No	Homogeneous	Strongly enlarged	Mild	2.1	No	Homogeneous	Strongly enlarged	Mild	1.7	N/A	N/A	N/A	N/A	N/A	N/A
50	Rem	M	69	II	74	67	10	10% or less	Desert	N/A	N/A	N/A	N/A	N/A	Yes	Homogeneous	Small	Mild	0.85	N/A	N/A	N/A	N/A	N/A	N/A
51	Rem	M	67	I	72	61	30	Between 10% and 50%	Inflamed	No	Inhomogeneous	Enlarged	Mild	0.9	No	Homogeneous	Small	Strong	0.5	N/A	N/A	N/A	N/A	N/A	N/A
52	Rem	F	30	I	73	49	25	Between 10% and 50%	Inflamed	No	Inhomogeneous	Enlarged	None	0.8	No	Homogeneous	Enlarged	None	1.1	N/A	N/A	N/A	N/A	N/A	N/A
53	Rem	F	73	I	69	53	N/A	N/A	N/A	No	Homogeneous	Small	Strong	N/A	No	Homogeneous	Small	Mild	0.85	N/A	N/A	N/A	N/A	N/A	N/A
54	Rem	F	49	II	66	64	N/A	N/A	N/A	No	Homogeneous	Strongly enlarged	Mild	N/A	No	Homogeneous	Enlarged	Mild	0.5	N/A	N/A	N/A	N/A	N/A	N/A
55	Rem	M	54	I	68	65	1	10% or less	Desert	No	Homogeneous	Enlarged	Mild	N/A	No	Homogeneous	Small	None	0.45	N/A	N/A	N/A	N/A	N/A	N/A
56	Rem	F	49	I	61	60	15	Between 10% and 50%	Excluded	N/A	N/A	N/A	N/A	N/A	No	Homogeneous	Enlarged	Mild	0.7	N/A	N/A	N/A	N/A	N/A	N/A
57	Rem	F	57	I	65	55	N/A	N/A	N/A	Yes	Inhomogeneous	Strongly enlarged	Strong	N/A	No	Homogeneous	Small	None	0.3	N/A	N/A	N/A	N/A	N/A	N/A
58	Rem	M	45	I	67	60	10	10% or less	Excluded	No	Inhomogeneous	Strongly enlarged	Mild	0.8	No	Homogeneous	Small	None	0.35	N/A	N/A	N/A	N/A	N/A	N/A
59	Rem	F	60	III	57	39	70	50% or higher	Inflamed	No	Homogeneous	Small	Mild	0.5	Yes	Inhomogeneous	Enlarged	Mild	1	N/A	No	Homogeneous	Small	None	1.1
60	Rem	F	67	I	58	50	20	Between 10% and 50%	Inflamed	No	Inhomogeneous	Enlarged	Strong	1.25	No	Inhomogeneous	Enlarged	Strong	0.6	N/A	N/A	N/A	N/A	N/A	N/A
61	Rem	F	67	I	51	42	10	10% or less	Desert	No	Homogeneous	Enlarged	Strong	1	No	Inhomogeneous	Enlarged	Strong	0.85	N/A	N/A	N/A	N/A	N/A	N/A
62	Rem	F	68	II	58	45	60	50% or higher	Excluded	No	Homogeneous	Enlarged	Mild	0.3	Yes	Inhomogeneous	Enlarged	Mild	1	N/A	N/A	N/A	N/A	N/A	N/A
63	Rem	F	52	I	56	56	20	Between 10% and 50%	Inflamed	No	Homogeneous	Enlarged	Mild	N/A	No	Homogeneous	Enlarged	Mild	0.8	N/A	N/A	N/A	N/A	N/A	N/A
64	Rem	M	79	II	52	38	15	Between 10% and 50%	Excluded	No	Homogeneous	Enlarged	Mild	1	No	Inhomogeneous	Enlarged	Strong	0.85	No	Yes	Inhomogeneous	Strongly enlarged	Strong	2
65	Rem	F	58	III	52	44	30	Between 10% and 50%	Inflamed	No	Homogeneous	Small	Mild	0.6	No	Homogeneous	Enlarged	Strong	1.1	No	No	Homogeneous	Enlarged	Mild	0.9
66	Rem	F	66	I	50	41	10	10% or less	Desert	N/A	N/A	N/A	N/A	N/A	N/A	N/A	N/A	N/A	N/A	N/A	N/A	N/A	N/A	N/A	N/A
67	Rem	F	66	II	50	41	20	Between 10% and 50%	Inflamed	Yes	Homogeneous	Strongly enlarged	Mild	1	No	Homogeneous	Enlarged	Mild	0.4	No	Yes	Homogeneous	Enlarged	Mild	1.1
68	Rem	M	65	III	49	38	20	Between 10% and 50%	Excluded	No	Homogeneous	Enlarged	Mild	0.7	No	Inhomogeneous	Enlarged	Strong	0.7	N/A	N/A	N/A	N/A	N/A	N/A
69	Rem	F	75	I	48	33	15	Between 10% and 50%	Desert	No	Homogeneous	Small	Mild	1	No	Homogeneous	Small	Strong	0.8	N/A	N/A	N/A	N/A	N/A	N/A
70	Rem	F	67	II	40	30	N/A	N/A	N/A	No	Homogeneous	Small	Mild	0.7	No	Homogeneous	Small	Strong	0	N/A	N/A	N/A	N/A	N/A	N/A
71	Rem	M	55	III	38	37	N/A	N/A	N/A	No	Homogeneous	Small	Mild	0.9	No	Homogeneous	Small	Mild	1.7	N/A	N/A	N/A	N/A	N/A	N/A
72	Rel	M	66	II	24	15	N/A	N/A	N/A	No	Homogeneous	Enlarged	Mild	N/A	No	Homogeneous	Enlarged	Mild	0.65	N/A	N/A	N/A	N/A	N/A	N/A
73	Rel	M	71	I	17	9	70	50% or higher	Inflamed	No	Homogeneous	Small	Strong	1.3	N/A	N/A	N/A	N/A	N/A	N/A	N/A	N/A	N/A	N/A	N/A
74	Rel	M	64	II	126	28	5	10% or less	Excluded	No	Homogeneous	Small	Mild	0.4	N/A	N/A	N/A	N/A	N/A	No	No	Homogeneous	Small	Mild	1
75	Rel	M	79	II	43	27	50	50% or higher	Inflamed	No	Inhomogeneous	Strongly enlarged	Mild	0.5	No	Homogeneous	Small	Strong	0.6	N/A	N/A	N/A	N/A	N/A	N/A
76	Rel	M	53	III	53	34	40	Between 10% and 50%	Inflamed	Yes	Homogeneous	Enlarged	Mild	0.75	N/A	N/A	N/A	N/A	N/A	No	Yes	Homogeneous	Enlarged	Mild	2
77	Rel	M	66	II	10	2	40	Between 10% and 50%	Inflamed	Yes	Homogeneous	Small	Mild	1.3	N/A	N/A	N/A	N/A	N/A	No	No	Homogeneous	Small	Mild	1
78	Rel	F	75	I	16	7	5	10% or less	Desert	No	Homogeneous	Small	Strong	1.3	N/A	N/A	N/A	N/A	N/A	N/A	N/A	N/A	N/A	N/A	N/A
79	Rel	F	61	III	7	4	40	Between 10% and 50%	Inflamed	No	Inhomogeneous	Enlarged	Mild	0.9	No	Homogeneous	Small	Strong	0.7	No	No	Inhomogeneous	Enlarged	Mild	0.8
80	Rel	F	66	II	8	4	80	50% or higher	Inflamed	Yes	Homogeneous	Small	Mild	0.5	N/A	N/A	N/A	N/A	N/A	No	No	Inhomogeneous	Strongly enlarged	Mild	1.6
81	Rel	M	74	III	10	3	5	10% or less	Excluded	No	Homogeneous	Enlarged	None	1	No	Homogeneous	Enlarged	Mild	1.1	N/A	N/A	N/A	N/A	N/A	N/A
82	Rel	F	56	III	19	11	80	50% or higher	Inflamed	No	Homogeneous	Strongly enlarged	None	1	N/A	N/A	N/A	N/A	N/A	No	No	Homogeneous	Strongly enlarged	None	2.1
83	Rel	M	69	I	62	16	70	50% or higher	Inflamed	No	Homogeneous	Small	Mild	0.5	No	Homogeneous	Small	Strong	0.6	N/A	N/A	N/A	N/A	N/A	N/A
84	Rel	F	69	II	98	27	80	50% or higher	Inflamed	No	Homogeneous	Small	Mild	1	No	Homogeneous	Small	Mild	0.8	No	No	Homogeneous	Small	None	1.15
85	Rel	F	77	III	23	16	80	50% or higher	Inflamed	No	Homogeneous	Small	Mild	1	No	Homogeneous	Small	Mild	0.4	No	No	Homogeneous	Small	Mild	0.4
86	Rel	M	59	II	11	3	80	50% or higher	Inflamed	No	Homogeneous	Strongly enlarged	Mild	2.1	No	Homogeneous	Small	None	0.3	N/A	N/A	N/A	N/A	N/A	N/A
87	Rel	M	63	II	17	14	70	50% or higher	Inflamed	N/A	N/A	N/A	N/A	N/A	No	Homogeneous	Small	Mild	0.3	N/A	N/A	N/A	N/A	N/A	N/A
88	Rel	F	67	I	54	7	70	50% or higher	Inflamed	No	Inhomogeneous	Enlarged	None	0.3	No	Homogeneous	Small	Mild	1.1	N/A	N/A	N/A	N/A	N/A	N/A
89	Rel	M	59	III	31	4	40	Between 10% and 50%	Inflamed	No	Homogeneous	Strongly enlarged	Mild	1.2	No	Inhomogeneous	Strongly enlarged	Strong	1	N/A	N/A	N/A	N/A	N/A	N/A
90	Rel	M	68	I	32	31	80	50% or higher	Inflamed	No	Homogeneous	Small	Strong	0.5	No	Inhomogeneous	Enlarged	Strong	1	N/A	N/A	N/A	N/A	N/A	N/A
91	Rel	M	59	III	55	6	20	Between 10% and 50%	Inflamed	No	Homogeneous	Small	Mild	0.2	N/A	N/A	N/A	N/A	N/A	Yes	No	Homogeneous	Small	Strong	0.85
92	Rel	F	81	I	15	11	50	50% or higher	Inflamed	No	Homogeneous	Strongly enlarged	Mild	1.1	N/A	N/A	N/A	N/A	N/A	N/A	N/A	N/A	N/A	N/A	N/A
93	Rel	M	73	III	7	2	5	10% or less	Desert	No	Inhomogeneous	Enlarged	Strong	1.2	No	Homogeneous	Small	Mild	0.1	N/A	N/A	N/A	N/A	N/A	N/A
94	Rel	M	63	II	16	9	10	10% or less	Excluded	No	Inhomogeneous	Strongly enlarged	Mild	N/A	No	Inhomogeneous	Enlarged	Mild	0.4	Yes	N/A	N/A	N/A	N/A	N/A
95	Rel	M	64	I	40	9	55	50% or higher	Inflamed	No	Homogeneous	Strongly enlarged	Strong	1.9	No	Homogeneous	Enlarged	Strong	1	N/A	N/A	N/A	N/A	N/A	N/A
96	Rel	M	62	I	6	4	10	10% or less	Desert	No	Inhomogeneous	Enlarged	Mild	0.9	No	Homogeneous	Small	None	0.4	N/A	N/A	N/A	N/A	N/A	N/A
97	Rel	M	60	I	18	18	5	10% or less	Desert	No	Homogeneous	Small	None	0.9	No	Homogeneous	Small	None	0.4	N/A	N/A	N/A	N/A	N/A	N/A
98	Rel	M	72	III	13	6	N/A	N/A	N/A	N/A	N/A	N/A	N/A	N/A	Yes	Homogeneous	Enlarged	Strong	0.5	No	No	Homogeneous	Enlarged	None	1.3
99	Rel	F	83	II	22	10	20	Between 10% and 50%	Excluded	Yes	Homogeneous	Small	Strong	1.3	N/A	N/A	N/A	N/A	N/A	N/A	N/A	N/A	N/A	N/A	N/A
100	Rel	M	70	I	131	8	20	Between 10% and 50%	Inflamed	No	Inhomogeneous	Enlarged	Strong	0.8	Yes	Homogeneous	Enlarged	Strong	0	N/A	N/A	N/A	N/A	N/A	N/A
101	Rel	M	49	III	13	9	10	10% or less	Desert	N/A	N/A	N/A	N/A	N/A	N/A	N/A	N/A	N/A	N/A	N/A	No	Homogeneous	Small	Mild	0.3
102	Rel	F	55	III	54	21	10	10% or less	Desert	No	Homogeneous	Small	Strong	0.6	N/A	N/A	N/A	N/A	N/A	No	No	Inhomogeneous	Enlarged	None	0.5
103	Rel	M	69	II	10	5	5	10% or less	Desert	No	Homogeneous	Small	Strong	0.8	N/A	N/A	N/A	N/A	N/A	N/A	N/A	N/A	N/A	N/A	N/A
104	Rel	M	56	III	45	20	5	10% or less	Desert	No	Homogeneous	Strongly enlarged	Mild	1.9	Yes	Inhomogeneous	Strongly enlarged	Mild	0.9	N/A	No	Inhomogeneous	Enlarged	Mild	0.6
105	Rel	M	69	I	15	7	5	10% or less	Excluded	No	Inhomogeneous	Strongly enlarged	Mild	2.2	No	Homogeneous	Small	Mild	0.5	N/A	N/A	N/A	N/A	N/A	N/A
106	Rel	M	68	III	40	8	95	50% or higher	Inflamed	N/A	N/A	N/A	N/A	N/A	No	Homogeneous	Small	Strong	0.9	No	No	Homogeneous	Enlarged	None	1.75
107	Rel	M	67	II	72	32	20	Between 10% and 50%	Inflamed	No	Inhomogeneous	Enlarged	Strong	0.9	N/A	N/A	N/A	N/A	N/A	No	No	Inhomogeneous	Enlarged	Strong	1.2
108	Rel	F	51	III	9	5	20	Between 10% and 50%	Excluded	Yes	Homogeneous	Small	Mild	N/A	No	Homogeneous	Small	Mild	0.8	N/A	N/A	N/A	N/A	N/A	N/A
109	Rel	M	69	I	42	14	15	Between 10% and 50%	Desert	Yes	Homogeneous	Strongly enlarged	Strong	1.5	No	Inhomogeneous	Enlarged	Strong	0.9	N/A	N/A	N/A	N/A	N/A	N/A
110	Rel	F	62	II	123	12	5	10% or less	Desert	No	Homogeneous	Small	Mild	0.7	No	Inhomogeneous	Enlarged	Mild	0.8	N/A	N/A	N/A	N/A	N/A	N/A
111	Rel	M	57	III	9	0	2	10% or less	Desert	Yes	Inhomogeneous	Strongly enlarged	Mild	1.7	Yes	Homogeneous	Small	Mild	1.65	N/A	N/A	N/A	N/A	N/A	N/A
112	Rel	M	69	I	91	32	1	10% or less	Desert	Yes	Homogeneous	Small	Mild	0.7	No	Homogeneous	Small	Strong	0.9	N/A	N/A	N/A	N/A	N/A	N/A
113	Rel	M	59	III	36	4	10	10% or less	Excluded	No	Inhomogeneous	Strongly enlarged	Mild	1.7	No	Inhomogeneous	Strongly enlarged	Strong	1.9	N/A	N/A	N/A	N/A	N/A	N/A
114	Rel	M	75	I	26	5	25	Between 10% and 50%	Inflamed	Yes	Inhomogeneous	Enlarged	Strong	0.8	No	Homogeneous	Small	Strong	0.8	N/A	N/A	N/A	N/A	N/A	N/A
115	Rel	M	72	II	13	2	1	10% or less	Desert	Yes	Homogeneous	Strongly enlarged	Mild	1.2	Yes	Homogeneous	Small	Mild	0.5	N/A	N/A	N/A	N/A	N/A	N/A
116	Rel	F	58	III	24	6	20	Between 10% and 50%	Inflamed	No	Inhomogeneous	Strongly enlarged	Strong	0.35	N/A	N/A	N/A	N/A	N/A	No	No	Homogeneous	Strongly enlarged	Mild	1.3
117	Rel	M	56	I	88	26	1	10% or less	Excluded	No	Homogeneous	Small	Strong	0.9	No	Homogeneous	Small	Mild	1	N/A	N/A	N/A	N/A	N/A	N/A
118	Rel	F	63	II	51	1	5	10% or less	Excluded	No	Inhomogeneous	Enlarged	Strong	N/A	No	Inhomogeneous	Enlarged	Strong	0.6	No	No	Inhomogeneous	Strongly enlarged	None	1.7
119	Rel	M	70	I	39	22	30	Between 10% and 50%	Inflamed	No	Homogeneous	Small	Strong	N/A	N/A	N/A	N/A	N/A	N/A	N/A	N/A	N/A	N/A	N/A	N/A
120	Rel	M	64	II	60	14	50	50% or higher	Inflamed	No	Homogeneous	Enlarged	Strong	0.5	N/A	N/A	N/A	N/A	N/A	No	No	Homogeneous	Small	Mild	0.3
121	Rel	M	66	II	24	3	1	10% or less	Excluded	No	Homogeneous	Small	None	0.55	No	Homogeneous	Small	Strong	0.5	N/A	N/A	N/A	N/A	N/A	N/A
122	Rel	M	45	III	12	2	70	50% or higher	Inflamed	No	Homogeneous	Small	Strong	1.3	N/A	N/A	N/A	N/A	N/A	No	No	Inhomogeneous	Strongly enlarged	Mild	1.2
123	Rel	F	63	I	8	7	1	10% or less	Excluded	No	Homogeneous	Small	Mild	0.85	No	Homogeneous	Small	Mild	0.9	N/A	N/A	N/A	N/A	N/A	N/A
124	Rel	M	68	III	11	2	5	10% or less	Desert	No	Homogeneous	Small	Mild	0.2	N/A	N/A	N/A	N/A	N/A	No	Yes	Homogeneous	Small	Mild	0.5
125	Rel	M	63	I	17	16	95	50% or higher	Inflamed	No	Homogeneous	Small	Mild	1.8	No	Homogeneous	Enlarged	Mild	1.3	N/A	N/A	N/A	N/A	N/A	N/A
126	Rel	F	73	I	46	6	5	10% or less	Excluded	No	Homogeneous	Small	Mild	0.5	No	Homogeneous	Small	Mild	0	N/A	N/A	N/A	N/A	N/A	N/A
127	Rel	F	65	II	29	9	2	10% or less	Desert	No	Homogeneous	Enlarged	Mild	0.3	No	Homogeneous	Enlarged	Mild	0.8	No	No	Inhomogeneous	Strongly enlarged	Mild	0.65
128	Rel	M	50	III	49	24	50	50% or higher	Inflamed	No	Homogeneous	Enlarged	Mild	0.8	No	Homogeneous	Small	Mild	0.7	No	No	Homogeneous	Small	Mild	0.7
129	Rel	M	70	II	38	6	1	10% or less	Desert	No	Homogeneous	Small	Mild	0.2	No	Homogeneous	Small	Strong	0.4	N/A	N/A	N/A	N/A	N/A	N/A
130	Rel	M	72	III	36	21	30	Between 10% and 50%	Excluded	No	Homogeneous	Enlarged	None	0.6	No	Homogeneous	Small	Mild	1	No	No	Inhomogeneous	Small	Mild	1.75
131	Rel	M	59	I	32	29	60	50% or higher	Inflamed	No	Homogeneous	Small	Mild	1	No	Homogeneous	Small	Strong	1.1	N/A	N/A	N/A	N/A	N/A	N/A
132	Rel	F	78	II	12	8	40	Between 10% and 50%	Inflamed	No	Homogeneous	Small	Mild	0.5	N/A	N/A	N/A	N/A	N/A	N/A	N/A	N/A	N/A	N/A	0.6
133	Rel	F	71	I	24	7	1	10% or less	Excluded	No	Inhomogeneous	Strongly enlarged	Mild	1.7	No	Homogeneous	Small	None	0.9	N/A	N/A	N/A	N/A	N/A	N/A
134	Rel	M	68	II	18	6	50	50% or higher	Inflamed	No	Homogeneous	Enlarged	Mild	0.9	No	Homogeneous	Small	Mild	0.65	No	No	Inhomogeneous	Strongly enlarged	Mild	1.9
135	Rel	F	55	II	29	24	20	Between 10% and 50%	Inflamed	No	Homogeneous	Small	Mild	N/A	No	Homogeneous	Small	Mild	0.6	N/A	N/A	N/A	N/A	N/A	N/A
136	Rel	F	65	II	15	7	30	Between 10% and 50%	Inflamed	No	Homogeneous	Small	Strong	1.1	No	Homogeneous	Small	Mild	1.5	No	No	Homogeneous	Small	None	0.9
137	Rel	M	76	II	7	7	1	10% or less	Desert	No	Inhomogeneous	Enlarged	Mild	N/A	No	Homogeneous	Small	Strong	0.6	N/A	N/A	N/A	N/A	N/A	N/A
138	Rel	F	69	III	8	4	10	10% or less	Desert	No	Inhomogeneous	Enlarged	Mild	0.9	No	Homogeneous	Small	Strong	0.9	N/A	N/A	N/A	N/A	N/A	N/A
139	Rel	F	78	III	37	17	50	50% or higher	Inflamed	No	Inhomogeneous	Enlarged	Mild	0.9	No	Inhomogeneous	Enlarged	Strong	0.9	Yes	No	Inhomogeneous	Enlarged	Mild	1.3
140	Rel	M	52	I	7	7	5	10% or less	Excluded	No	Inhomogeneous	Strongly enlarged	Mild	7	No	Homogeneous	Small	None	0.9	N/A	N/A	N/A	N/A	N/A	N/A
141	Rel	M	79	I	20	7	20	Between 10% and 50%	Inflamed	No	Homogeneous	Small	Strong	1	No	Homogeneous	Small	Mild	0.6	N/A	N/A	N/A	N/A	N/A	N/A
142	Rel	M	63	III	29	19	20	Between 10% and 50%	Excluded	No	Homogeneous	Small	Mild	N/A	No	Homogeneous	Small	Mild	0.5	N/A	N/A	N/A	N/A	N/A	N/A
143	Rel	F	79	II	13	3	10	10% or less	Excluded	No	Inhomogeneous	Enlarged	Mild	0.7	Yes	Homogeneous	Small	Strong	1.1	No	No	Homogeneous	Small	None	0.8
144	Rel	M	75	I	26	14	10	10% or less	Excluded	No	Inhomogeneous	Strongly enlarged	Strong	0.9	No	Homogeneous	Small	Mild	0.4	N/A	N/A	N/A	N/A	N/A	N/A
145	Rel	M	38	III	16	6	60	50% or higher	Inflamed	No	Homogeneous	Enlarged	Mild	1.4	No	Homogeneous	Small	Mild	0.7	N/A	N/A	N/A	N/A	N/A
146	Rel	M	74	III	10	2	5	10% or less	Desert	N/A	N/A	N/A	N/A	N/A	N/A	N/A	N/A	N/A	N/A	No	No	Homogeneous	Small	Mild	0.9
147	Rel	M	74	III	10	1	5	10% or less	Desert	No	Homogeneous	Small	Strong	1	No	Homogeneous	Small	None	0	No	No		Small	Mild	1.7
148	Rel	M	78	III	21	1	5	10% or less	Desert	No	Homogeneous	Small	Mild	N/A	N/A	N/A	N/A	N/A	N/A	No	N/A	N/A	N/A	N/A	N/A
149	Rel	F	56	III	17	0	40	Between 10% and 50%	Inflamed	No	Inhomogeneous	Enlarged	Strong	1.7	No	Inhomogeneous	Strongly enlarged	Strong	1	No	No	Homogeneous	Enlarged	Strong	2
150	Rel	M	68	III	6	3	1	10% or less	Desert	No	Homogeneous	Strongly enlarged	Strong	0.4	N/A	N/A	N/A	N/A	N/A	Yes	No	Homogeneous	Small	None	2.1
151	Rel	M	60	I	208	23	20	Between 10% and 50%	Inflamed	No	Homogeneous	Enlarged	Strong	0.9	No	Homogeneous	Small	Strong	0.9	N/A	N/A	N/A	N/A	N/A	N/A

## Sheet: Abbreviations
Abbreviation	Full name
AffLN	Tumor-affected lymph node
F	Female
HilLN	Hilar lymph node
M	Male
MedLN	Mediastinal lymph node
N/A	Not available
Rel	Relapse
Rem	Remission
